# Supplementary material
Source: PubMed Central journal article supplement (PMC6331062)
Supplement: NIHMS1000974-supplement-tables.pdf [file NIHMS1000974-supplement-tables.pdf]

**Table S1. Sequences of oligonucleotides**

|              |                                                                                                                                                    |
|--------------|----------------------------------------------------------------------------------------------------------------------------------------------------|
| I Forward    | AGCTTAGTACTCGCTGAGGGTGAACAAGAAAAGACCTGATAAAGATTAACCAGAAGAAA<br>ACAAGGAGGGAACAACCGCAGCCTGTAGCAAGCTCTGGAAGTCAAGAGTCGCGCGC<br>TAGGGCCGGGGCCGGGGCC     |
| I Reverse    | CCGGCCCCGGCCCCCTAGCGCGCGACTCCTGAGTTCCAGAGCTTGCTACAGGCTGCGG<br>TTGTTTCCCTCCTTGTCTTCTGTTAATCTTTATCAGGTCTTTTCTTGTTCACCTCA<br>GCGAGTACTA               |
| II Forward   | AGCTTAGTACTCGCTGAGGGTGAACAAGAAAAGACCTGATAAAGATTAACCAGAAGAAA<br>ACAAGGAGGGAACAACCGCAGCCTGTAGCAAGCTCTGGAAGTCAAGAGTCGCGCGC<br>TATAGGGGGCCGGGGCCGGGGCC |
| II Reverse   | CCGGCCCCGGCCCCCTATAGCGCGCGACTCCTGAGTTCCAGAGCTTGCTACAGGCTG<br>CGGTTGTTCCCTCCTTGTCTTCTGTTAATCTTTATCAGGTCTTTTCTTGTTCACCC<br>TCAGCGAGTACTA             |
| III Forward  | GGGGCCGGGGCCGGGGCCGGGGCCGGGGCCGGGGCCGGGGCCGGGGCCGGGGCCGGGGC<br>CGGGCCCAAGGAAAGC                                                                    |
| III Reverse  | GGCCGCTTTCCTTGGGCCCGGCCCGGCCCGGCCCGGCCCGGCCCGGCCCGGCCCGGCC<br>CGGGCCCCGGCCCCGGGGCCGGGGCC                                                           |
| IV Forward   | GGGGCCGGGGCCGGGGCGTGGTGGGGCCGGGGCCGGGGCCGGGGCCGGGGCCGGGGCGG<br>GGCTGCGGTTGCGGTGCCTGCGCCCGCGCGCGGAGGCCAGGCCGTTGGCGAGT<br>GGGGGATCAAACGC             |
| IV Reverse   | GGCCGCGTTTGATCCCCACTCGCCACCGCCTGCGCCTCCGCCCGCGGGCGCAG<br>GCACCGCAACCGCAGCCCCGCCCCGGGCCGCCCGGGCCCGCCCCGACACGC<br>CCCCGGCCCCGGGGCCGGGGCC             |
| V forward    | AGCTTAGTACTCGCTGAGGGTGAACAAGAAAAGACCTGATAAAGATTAACCAGAAGAAA<br>ACAAGGAGGGAACAACCGCAGCCTGTAGCAAGCTTAGGAAGTCAAGAGTCGCGCGC                            |
| V reverse    | TAGCGCGCGACTCCTGAGTTCCCTAAGCTTGCTACAGGCTGCGGTTGTTTCCCTCCTTG<br>TTTTCTTCTGGTAAATCTTTATCAGGTCTTTTCTTGTTCACCTCAGCGAGTACTA                             |
| VI forward   | AGCTTAGTACTCGCTGAGGGTGAACAAGAAAAGACCTGATAAAGATTAACCAGAAGAAA<br>ACAAGGAGGGAACAACCGCAGCCTGTAGCAAGCTCTAGAAGTCAAGAGTCGCGCGC                            |
| VI reverse   | TAGCGCGCGACTCCTGAGTTCTAGAGCTTGCTACAGGCTGCGGTTGTTTCCCTCCTTG<br>TTTTCTTCTGGTAAATCTTTATCAGGTCTTTTCTTGTTCACCTCAGCGAGTACTA                              |
| VII forward  | AGCTTAGTACTCGCTGAGGGTGAACAAGAAAAGACCTGATAAAGATTAACCAGAAGAAA<br>ACAAGGAGGGAACAACCGCAGCCTGTAGCAAGCTCCCGAAGTCAAGAGTCGCGCGC                            |
| VII reverse  | TAGCGCGCGACTCCTGAGTTCCGGAGCTTGCTACAGGCTGCGGTTGTTTCCCTCCTTG<br>TTTTCTTCTGGTAAATCTTTATCAGGTCTTTTCTTGTTCACCTCAGCGAGTACTA                              |
| VIII forward | AGCTTAGTACTCGCTGAGGGTGAACAAGAAAAGACCTGATAAAGATTAACCAGAAGAAA<br>ACAAGGAGGGAACAACCGCAGCCTGTAGCAATCTCTGGAAGTCAAGAGTCGCGCGC                            |
| VIII reverse | TAGCGCGCGACTCCTGAGTTCCAGAGATTGCTACAGGCTGCGGTTGTTTCCCTCCTTG<br>TTTTCTTCTGGTAAATCTTTATCAGGTCTTTTCTTGTTCACCTCAGCGAGTACTA                              |
| IX forward   | AGCTTAGTACTCGCTGAGGGTGAACAAGAAAAGACCTGATAAAGATTAACCAGAAGAAA<br>ACAAGGAGGGAACAACCGCAGCCTGTAGCAAGCTCTGAAACTCAGGAGTCGCGCGC                            |
| IX reverse   | TAGCGCGCGACTCCTGAGTTTCCAGAGCTTGCTACAGGCTGCGGTTGTTTCCCTCCTTG<br>TTTTCTTCTGGTAAATCTTTATCAGGTCTTTTCTTGTTCACCTCAGCGAGTACTA                             |
| X forward    | AGCTTAGTACTCGCTGAGGGTGAACAAGAAAAGACCTGATAAAGATTAACCAGAAGAAA<br>ACAAGGAGGGAACAACCGCAGCCTGTAGCAAGCTCTGCAACTCAGGAGTCGCGCGC                            |
| X reverse    | TAGCGCGCGACTCCTGAGTTGCAGAGCTTGCTACAGGCTGCGGTTGTTTCCCTCCTTG<br>TTTTCTTCTGGTAAATCTTTATCAGGTCTTTTCTTGTTCACCTCAGCGAGTACTA                              |
| XI forward   | AGCTTAGTACTCGCTGAGGGTGAACAAGAAAAGACCTGATAAAGATTAACCAGAAGAAA<br>ACAAGGAGGGAACAACCGCAGCCTGTAGCAATAGGCTCTGGAAGTCAAGAGTCGCG<br>CGC                     |
| XI reverse   | TAGCGCGCGACTCCTGAGTTCCAGAGCCTATTGCTACAGGCTGCGGTTGTTTCCCTCC<br>TTGTTTTCTTCTGGTAAATCTTTATCAGGTCTTTTCTTGTTCACCTCAGCGAGTACTA                           |
| XII forward  | AGCTTAGTACTCGCTGAGGGTGAACAAGAAAAGACCTGATAAAGATTAACCAGAAGAAA<br>ACAAGGAGGGAACAACCGCAGCCTGTAGCAAGCTATGGAAGTCAAGAGTCGCGCGC                            |
| XII reverse  | TAGCGCGCGACTCCTGAGTTCCATAGCTTGCTACAGGCTGCGGTTGTTTCCCTCCTTG<br>TTTTCTTCTGGTAAATCTTTATCAGGTCTTTTCTTGTTCACCTCAGCGAGTACTA                              |

**Table S2. Primer sets (5'->3')**

|           |                                          |
|-----------|------------------------------------------|
| GA-nLuc-F | AAGGAAAAAAGCGGCCGCAGTCTTCACACTCGAAGATTT  |
| GP-nLuc-F | AAGGAAAAAAGCGGCCGCAAGTCTTCACACTCGAAGATTT |
| GR-nLuc-F | AAGGAAAAAAGCGGCCGCGTCTTCACACTCGAAGATTT   |
| nLuc-R    | ACATTTGGATCCTTACGCCAGAATGCGTTTCGC        |
| fLuc-F    | AAGGAAAAAAGCTAGCACCATGGAAGATGCCAAAAA     |
| fLuc-R    | AAGGAAAAAACTTAAGTTACACGGCGATCTTGCCGC     |
| RT-fLuc-F | GCAGTACCGGATTGCCCAAG                     |
| RT-fLuc-R | GTCGGGGATGATCTGGTTGC                     |
| RT-nLuc-F | CAGCCGGCTACAACCTGGAC                     |
| RT-nLuc-R | AGCCCATTTTCACCGCTCAG                     |
